# Influence of *Oenococcus oeni* and *Brettanomyces bruxellensis* on Aged Wine Microbial Taxonomic and Functional Profiles

Marie Lisandra Zepeda-Mendoza<sup>1\*</sup>, Nathalia Kruse Edwards<sup>1</sup>, Mikkel Gulmann Madsen<sup>1</sup>, Martin Abel-Kistrup<sup>1</sup>, Lara Puetz<sup>2</sup>, Thomas Sicheritz-Ponten<sup>3</sup>, Jan H. Swiegers<sup>1\*</sup>

<sup>1</sup>*Chr. Hansen A/S, Bøge Allé 10, 2970 Hørsholm, Denmark.*

<sup>2</sup>*Centre for GeoGenetics, Natural History Museum of Denmark, University of Copenhagen. Øster Voldgade 5-7, 1350 Copenhagen K, Denmark.*

<sup>3</sup>*Center for Biological Sequence Analysis, Department of Bio and Health Informatics, Technical University of Denmark, Anker Engelunds Vej 1 Bygning 101A, 2800 Kgs. Lyngby, Denmark.*

**\*Corresponding authors:** Jan H. Swiegers, e-mail: [dkhsw@chr-hansen.com](mailto:dkhsw@chr-hansen.com), Lisandra Zepeda-Mendoza, e-mail: [dklize@chr-hansen.com](mailto:dklize@chr-hansen.com)

## Abstract

In the wine making process, the interactions between lactic acid bacteria (LAB), yeast and other wine microflora have an impact on the wine quality. In this study, we investigate the influence of the LAB *Oenococcus oeni* and the spoilage yeast *Brettanomyces bruxellensis* on the microbial community of a Cabernet Sauvignon wine. We generated metagenomic datasets from inoculations of three strains of *B. bruxellensis*, in combination with two *O. oeni* strains, one with and one without cinnamoyl esterase activity. This esterase activity releases hydroxycinnamic acids (HCAs) that can subsequently be processed by some *B. bruxellensis* strains able to generate off-flavor compounds. We evaluated the influence of the *O. oeni* and *B. bruxellensis* on the microbial taxonomic and functional potential profile, particularly regarding off-flavor formation due to HCAs. We found that the effect on the microbial profiles depends on *i*) the *O. oeni* and *B. bruxellensis* strains being combined and *ii*) the abundance they reach in the final wine, which depends on certain unidentified conditions. We confirmed that the potential of *B. bruxellensis* to produce off-flavor

compounds from HCAs depends on the strain. Interestingly, the samples without microbial inoculants also had this potential, suggesting that native grape microbiota could also influence the levels of HCA. We also found that the presence of *B. bruxellensis* does not interfere with the malolactic fermentation of the evaluated *O. oeni* strains, which leads to a less acidic taste. We show that metagenomic approaches can help uncover the complex wine microbial community traits, such as flavor, impacted by the simultaneous presence of *O. oeni* and *B. bruxellensis*.

**Keywords:** Microbiome, metagenomics, *Brettanomyces bruxellensis*, *Oenococcus oeni*, malolactic fermentation, alcoholic fermentation, hydroxycinnamic acids, off-flavor formation.

## Introduction

### *Wine-making and wine microbial interactions*

The study of the wine microbial ecosystem has mostly been focused on the two key fermentation players, *Saccharomyces cerevisiae*, which performs the alcoholic fermentation (AF), and *Oenococcus oeni*, which performs the malolactic fermentation (MLF), although other genus and species can also affect the wine characteristics. MLF is in fact a decarboxylation process where dicarboxylic L-malic acid (malate) is converted to monocarboxylic L-Lactic acid (lactate) and CO<sub>2</sub>, which can result in a rise in pH. Thus, MLF softens the acid structure of the wine, as L-lactic acid is perceived as less acidic than L-malic acid. MLF usually starts spontaneously about 1-3 weeks after completion of AF and lasts 2-12 weeks. Furthermore, some carbohydrates are metabolized during MLF and there is release of phenolic acids and synthesis of esters, among other reactions, which are important for the wine flavour profile (Lonvaud-Funel n.d.). LAB naturally present in wine, or commercial strains isolated from wine, are normally used for MLF, with *O. oeni* being the preferable species due to its ethanol and acid tolerance and flavour profile (reviewed by Liu 2002 (Liu 2002)).

In the process of fermented food and beverage making, the starting ingredients can have associated indigenous microbial communities (Leff et al. 2013), which might vary depending on the source

and could have an impact on the final product characteristics. This has been investigated in wine, where the grape microbiota is influenced by cultivar, vintage, and climate (Bokulich et al. 2014). Besides yeasts, such as *Saccharomyces*, and filamentous fungi, such as *Aspergillus* and *Penicillium*, a large bacterial diversity has been observed on grapes and must. The bacterial community is formed mainly by Proteobacteria, including acetic acid bacteria, and Firmicutes, including lactic acid bacteria (LAB) (reviewed by Barata et al. (2012) (Barata et al. 2012)). Some bacteria are plant or environmental microbes, while others have the physiological characteristics to allow them to grow on the harsh oenological conditions (Pina et al. 2004) (low nutrients, high acidity, ethanol concentrations of up to 15% v/v), thus being able to form part of the wine microbiome (Barata et al. 2012). The microbial interactions, as well as their succession dynamics through the wine making process affect the hygienic and organoleptic properties of the final wine product (Sieuwerdt et al. 2008). For example, *Botrytis cinerea* influences the microbial taxonomic profile through release of nutrients (Barata et al. 2008); one of those affected yeasts is the genus *Metschnikowia*, which can in turn prevent the growth of other fungi and bacteria by sequestering iron (Sipiczki 2006). Microbial interactions are also known to be highly strain specific. For example, a strain of *S. cerevisiae* has been shown to produce antimicrobial peptides under oenological conditions, which can inhibit growth of *Brettanomyces bruxellensis* (Branco et al. 2014). In the wine industry, *B. bruxellensis* is a spoilage yeast difficult to get rid of, mostly present in barrel aged wines (reviewed by Suarez et al. 2006 (Suarez et al. 2007)).

### ***Hydroxycinnamic acids***

A potential source of off-flavour compounds is hydroxycinnamic acids (HCAs). HCAs are organic acids, naturally present in grapes and wines, however, they are usually found as tartaric acid bound esters in grapes and wine. The content depends on the grape variety and growth conditions (Nagel & Wulf 1979). This family of organic acids has been studied in wine and some food systems for its properties, such as colour stabilizing (Hernández et al. 2006), antioxidant (Bouzanquet et al. 2012), radical scavenging (Kikuzaki et al. 2002), and antimicrobial activity against some yeast and bacteria

78 (Ou & Kwok 2004). However, the full effect of HCAs in food and in wine is not yet fully  
79 understood. Some LAB strains of *Oenococcus* and other *Lactobacillus* have been shown poses a  
80 cinnamoyl esterase activity, which releases HCAs from their bound form (Cabrita et al. 2008). It  
81 has been shown that the cinnamoyl esterase can also be present in different fungi (Rumbold et al.  
82 2003). Furthermore, HCAs can also be released by chemical hydrolysis due to the acidity of the  
83 wine in a slow process that gradually continues through the winemaking and storage (Hixson et al.  
84 2012). *B. bruxellensis* does not have the capability of producing free HCAs, however some strains  
85 possess a decarboxylase and a vinyl reductase activity, which can convert them into the off-flavour  
86 volatile phenols 4-ethylphenol and 4-ethylguaiacol, which confer the “Brettanomyces aroma”  
87 (Hixson et al. 2012). An increase in free HCAs could hereby potentially increase the risk of  
88 spoilage by a *B. bruxellensis* strain with both activities (reviewed by Kheir et al. 2013 (Kheir et al.  
89 2013)). Importantly, Madsen *et al.* (2016) (Madsen et al. 2016) showed that the concentration of  
90 volatile phenols depends more on the strain of *Brettanomyces* than on the HCA esterase activity of  
91 *O. oeni*. Thus, the strain of *B. bruxellensis* is key in determining the volatile phenol concentration.  
92 Determination of the effect of a specifically selected starter or mixed-starter culture of yeast and  
93 bacteria on the wine profile cannot be effectively done without also characterizing the entire  
94 microbial community (Liu et al. 2017). Furthermore, although factors affecting yeast biodiversity  
95 have been widely documented, less characterization has been performed on the factors that  
96 influence the bacterial population. While several studies have characterized the microbiota on the  
97 grape surface and must, there is scarcity in the characterization of the microbial community in the  
98 final wine product. “Omics” methodologies in the food sciences, in particular in fermented goods,  
99 have been applied for the deeper and broader analysis of the microbial system relevant to both the  
100 fermentation process and the characteristics of the final product (De Filippis et al. 2017). In this  
101 study, we undertook a metagenomic approach to characterize the impact of the inoculations of two  
102 different strains of *O. oeni* (with and without the esterase activity) and three *B. bruxellensis* strains,  
103 alone and in combination, on the wine microbial community six months post-inoculation in a

Cabernet Sauvignon wine. We furthermore characterized the MLF activity in the inoculations by measuring the abundance of malic acid.

# **Materials and Methods**

## **Wine inoculation**

Destemmed grape must from Cabernet Sauvignon before AF was imported from Bulgaria by Chr. Hansen A/S. *S. cerevisiae* strain NI6 was used for AF in 50 L tanks. The wine was pressed through filter cloths to remove grape seeds and skin. After mixing the wine by stirring, the wine was decanted into 5 L containers and stored at 5 °C. The wine was measured on an Oenofoss and had an alcohol percent of 12.6 %, 0.0 g/L glucose and 0.0 g/L fructose. The sulphite level was measured with a Megazyme kit and found to be 25 ppm. The pH was measured during MLF and remained at 3.5.

Pure cultures of *B. bruxellensis* were stored on YGC agar to ensure viability of the yeasts throughout the experiment. YGP broth was made with 5.0 g yeast extract, 10.0 g peptone and 11.0 g glucose monohydrate and milli-q water added until 1 L total volume in a conical flask. The mixture was dissolved using a magnetic stirrer. The pH was adjusted to  $5.6 \pm 0.2$  with 1 M HCL and 1 M NaOH and hereafter autoclaved at 121 °C for 15 minutes. The broth was kept in a refrigerator at 5 °C until use. CBS 73 had been frozen in glycol and was rejuvenated in YGP broth for 48 hours at 25 °C before being inoculated into a new YGP broth, grown for 72 hours at 25 °C and then plated on YGC agar. The two other strains were directly inoculated in YGP broth and then plated on YGC agar. All strains were incubated at 25 °C. A sample from each flask was counted after 72 hours on a hemocytometer (see 3.2) where the strains reached a level of approx.  $10^6$ - $10^7$  CFU/mL. CBS 73 (Brett\_A), CBS 2336 (Brett\_B) and CBS 2499 (Brett\_C) and were continually grown for 72 hours at 25 °C.

Two different strains of *O. oeni* were provided by Chr. Hansen A/S and kept frozen at -18 °C. One of the *O. oeni* strains is cinnamoyl esterase negative (from here on referred to as OEN), while the

other is cinnamoyl esterase positive (from here on referred to as OEP), which can hereby potentially liberate HCAs. 1.2 g frozen culture made for direct inoculation was dissolved in 200 mL sterilized peptone water and 5 mL was added to 1 L of wine corresponding to an inoculation level of approx. 10<sup>6</sup> CFU/mL. The cell concentrations in the YGP broth right before inoculation were determined using a hemocytometer where cells were counted in the microscope.

Wine was collected from Chr. Hansen A/S in the morning of day 0 of MLF. Wine was poured into 20 autoclaved 1 L blue-cap bottles and 4 autoclaved 5 L blue-cap bottles. Control wines were put aside in a tempered room (20 °C). To minimize cross-contamination, the wines for MLF were then inoculated with OEP and OEN and two wines of each (MLF control) were put aside in a tempered room. The rest of the OEP wines were then inoculated with either Brett\_A, Brett\_B or Brett\_C, one at a time. Afterwards, the wines with OEN were inoculated also with the respective *B. bruxellensis* strains. Control wines containing only *B. bruxellensis* were finally inoculated one strain at a time. *B. bruxellensis* was inoculated at a concentration of approx. 5 X 10<sup>2</sup> by pipetting.

### Measurement of MLF

An enzyme test-kit was used to measure the malic acid content. Samples were taken on days 0, 4, 7, 10, 14 and 114 from every bottle and frozen for later analysis using a malic acid enzyme test-kit (R-Biopharm, Germany) and absorbance measurements on a spectrophotometer. A cuvette with 1.00 cm light path was used at wavelength 340 nm at 20-25 °C. The cuvettes were prepared according to the kit instructions. We calculated the malic acid concentration using the absorbance values.

### DNA extraction and sequencing

The wines were sampled on day 114 after inoculation. The bottles of wine were gently swirled before sampling to ensure proper mixing of the wine. Sterile B. Braun omnifix syringes without needles were used to take samples from the bottles with a minimum of oxygen intake, although it could not be entirely avoided. The samples were frozen at -60 °C until analysis.

For DNA isolation, cells were pelleted from 50 mL of wine centrifuged at 4500 g for 10 minutes and subsequently washed three times with 10 mL of 4°C phosphate buffered saline (PBS). The

pellet was mixed with G2-DNA enhancer (Ampliqon, Odense, Denmark) in 2 ml tubes and incubated at RT for 5 min. Subsequently, 1 mL of lysis buffer (20 mM Tris-HCl- pH 8.0, 2 mM EDTA and 40mg/ml lysozyme) was added to the tube and incubated at 37°C for one hour. An additional 1 mL of CTAB/PVP lysis buffer was added to the lysate and incubated at 65°C for one hour. DNA was purified from 1 mL of lysate with an equal volume of phenol-chloroform-isoamyl alcohol mixture 49.5: 49.5: 1 and the upper aqueous layer was further purified with a MinElute PCR Purification kit and the QIAvac 24 plus (Qiagen, Hilden, Germany), according to the manufacturer's instructions, and finally eluted in 100 ul DNase-free H<sub>2</sub>O.

Prior to library building, genomic DNA was fragmented to an average length of ~400 bp using the Bioruptor® XL (Diagenode, Inc.), with the profile of 20 cycles of 15 s of sonication and 90 s of rest. Sheared DNA was converted to Illumina compatible libraries using NEBNext library kit E6070L (New England Biolabs) and blunt-ended library adapters described by Meyer and Kircher (2010) (Meyer & Kircher 2010). The libraries were amplified in 100-µL reactions, with each reaction containing 20 µL of template DNA, 10 U AmpliTaq Gold polymerase (Applied Biosystems, Foster City, CA), 1× AmpliTaq Gold buffer, 2.5 mM MgCl<sub>2</sub>, 0.2 mM of each dNTP, 0.2 uM IS4 forward primer and 0.2 uM reverse primer with sample specific 6 bp index. The PCR conditions were 12 minutes at 95°C to denature DNA and activate the polymerase, 14 cycles of 95°C for 20 seconds, 60°C annealing for 30 seconds, and 72°C extension for 40 seconds, and a final extension of 72°C extension for 5 minutes. Following amplification, libraries were purified with Agencourt AMPure XP (Beckman Coulter, Inc) bead purification, following manufacturer's protocol, and eluted in 50 uL of EB buffer (Qiagen, Hilden, Germany). The quality and quantity of the libraries were measured on the Bioanalyzer 2100 (Agilent technologies, Santa Clara, United States), and the libraries were pooled at equimolar concentration. Sequencing was performed on the Illumina HiSeq 2500 in PE100 mode following the manufacturer's instructions.

### **Metagenomic taxonomic profiling**

The reads were first cleaned with cutadapt (Martin 2011) to remove adapter sequences and low



quality bases (min quality= 33, 3'-end minimum quality= 30, minimum length= 30). In order to evaluate the inoculation efficiency of the *O. oeni* and the *B. bruxellensis* strains, we mapped with bwa v0.7.10 (Li & Durbin 2009) the cleaned reads against the genomes of the *O. oeni* strains (in house genomic sequences) and the published genome of *B. bruxellensis* (CBS 2499 v2.0) and calculated the depth and breadth of coverage using samtools v1.3.1 and bedtools v.2.26. The coverage statistics of *B. bruxellensis* were calculated excluding the scaffolds AHMD01000878.1, AHMD01000885.1 and AHMD01000879.1, which contain rDNA tandem repeats, which we found to artificially inflate the coverage due to mapping of reads likely deriving from other yeasts.

In order to characterize the microbial profiles of the inoculations, we used MGmapper (Petersen et al. 2017) to first map the reads against the *phi* genome. The non-mapping reads were then used to map against the next databases extracted from NCBI (2016/09/20) in "best mode": human, plant, vertebrates, invertebrates, virus, fungi, protozoa, plasmid, and bacteria. The number of mapping reads, coverage and depth were calculated, and the hits were annotated from the superkingdom to the species taxonomic level. The identifications were filtered by taking into account the next parameters: minimum abundance of 0.01%, minimum ratio of unique mapping reads and total mapping reads of 0.005, maximum edit distance of 0.01, and minimum of 10 mapping reads.

# **Metagenomic taxonomic comparison**

In order to compare the microbial populations of the different inoculation samples we first built a matrix with the number of reads mapping to the filtered identifications from all the samples and normalized the counts by percentage of abundance. We used this matrix to *i*) identify the core microbiomes of each type of inoculation, *ii*) the diversity distance, *iii*) to perform principal component analysis (PCA), *iv*) differential abundance, and *v*) abundance correlation analyses using R. The comparative analyses were performed excluding the out-layer samples with the highest and lowest depth of sequencing (OEN\_B\_18 and OEN\_23, respectively).

The taxonomic cores were obtained by identifying the microbes present in all the replicates of each inoculation type. We calculated the microbial diversity distance between and within the inoculation



208 types using the R package vegan using the Bray, Jaccard, and Euclidean distances and clustered  
 209 them with the ward.D and average methods. The differential abundance was performed using Fisher  
 210 test with alternative hypotheses greater and less. We built the contingency tables using the mean of  
 211 the technical replicates of the inoculation types and performed the next comparisons: *i*) all the  
 212 inoculation types versus the controls, *ii*) the combinations of OEP and the three *B. bruxellensis*  
 213 strains versus OEP, *iii*) the combinations of OEN and the three *B. bruxellensis* strains versus OEN,  
 214 *iv*) OEP versus OEN, *v*) the combinations of each *B. bruxellensis* strain and the two *O. oeni* strains  
 215 versus the given *B. bruxellensis* strain. The *p* values (*P*) were adjusted by the false discovery rate  
 216 (FDR) and the significant comparisons were those with  $FDR \leq 0.05$ .

217 The abundance correlations were performed with the R function cor.test using the Spearman  
 218 method. We removed from the normalized count matrix those identifications present in less than 10  
 219 samples. We defined two types of significant correlations ( $P < 0.05$  and  $\rho < -0.4$  or  $\rho > 0.7$ ): a)  
 220 Unaffected correlations: the ones identified when comparing all the samples and when comparing  
 221 without each of the inoculation types. b) Affected correlations: the ones that were identified only  
 222 when removing one of the inoculation types. In order to identify the top 5% abundant taxa in each  
 223 sample, we normalized by depth of coverage. We also identified which top abundant species were  
 224 present in all the technical replicates of each inoculation type.

## 225 **Metagenomic functional potential profiling**

226 The presence of HCA decarboxylase gene (*HcD*) in the used *B. bruxellensis* strains was confirmed  
 227 using lastz (Harris 2007) to identify the genomic region of the *B. bruxellensis* sequence used as  
 228 reference containing the sequence of *HcD* transcript id HQ693758.1 and using bedtools to extract  
 229 the coverage of the mappings of the samples OEP\_A\_10, OEP\_B\_11, and OEP\_C\_13 (the ones  
 230 with the highest coverage of each *B. bruxellensis* strain).

## 231 *Nr* gene set catalogue

232 The cleaned reads were *de novo* assembled using IDBA-UD v1.1.1 (Peng et al. 2012) using the pre-  
 233 correction parameter in order to account for the uneven sequencing depths. Genes were then

234 predicted on the assemblies with prodigal v2.6.2 (Hyatt et al. 2010) using the meta mode.

235 Afterwards, the predicted genes of each sample were clustered using vsearch v2.1.2 (Edgar 2010)

236 with an identity threshold of 95% and a minimum sequence length of 20. The centroid sequence of

237 each cluster was kept as the representative sequence to form a non-redundant (nr) gene set.

238 Afterwards, the nr gene sets were pooled and clustered using usearch with the same parameters to

239 generate the final nr gene set catalogue used for the functional potential comparative analyses.

240 *Comparative analyses*

241 The reads of each sample were mapped against the nr gene set catalogue using bwa mem (Li &

242 Durbin 2009) to then obtain the coverage of each gene using samtools and bedtools. The coverage

243 was used to build an abundance matrix. We then performed principal component analysis (PCA) on

244 the normalized matrix using the function prcomp from R v3.2.0 with scaling. Given that sample

245 OEN\_23 was identified as an extreme outlier and that the *O. oeni* inoculation did not succeed in

246 this replicate, it was removed from the subsequent comparative functional potential analyses. As

247 another method to evaluate the variation between and within the inoculation types, we calculated

248 the Bray, Jaccard and Euclidean distances with the R package vegan using the abundance matrix

249 and the values were clustered using the average and the ward.D methods.

250 Next, we assigned a KEGG orthology (KO) to the predicted nr genes using blastx with e-value

251 0.000001 against the KEGG database. The blast hits were filtered by a minimum bit score of 50 and

252 minimum of 30% identity. A new abundance matrix was built for the genes with a KO

253 identification. Subsequently, we identified KOs in differential abundance, i.e. statistically

254 significant less or more abundant in a given inoculation type when compared to another inoculation

255 type. To this end, we performed in R a Fisher test with the alternative hypothesis of greater and less

256 and corrected *P* using FDR. A contingency table for the Fisher tests using the mean of the replicates

257 was made for comparing each of the inoculation types against the control, the OEP\_A/B/C against

258 OEP, OEN\_A/B/C against OEN, OEN against OEP, and each of the *O. oeni*\_A/B/C against the

259 corresponding *B. bruxellensis* strain. We kept as statistically significant those with a FDR  $\leq$  5%.

260 The differentially abundant KOs were then grouped by the pathways they are part of as annotated in  
 261 KEGG and a two-sided Fisher test was performed as previously described for the KOs using as  
 262 counts the number of differentially abundant KOs belonging to that pathway. We kept as significant  
 263 those with  $P \leq 0.05$ . Then, we identified those differentially abundant pathways present in a  
 264 minimum of 4 samples, those present only in the comparisons against the control, the OEP\_A/B/C  
 265 combinations against OEP, the OEN\_A/B/C combinations against OEN, OEP against OEN, and the  
 266 two *O. oeni* strains combined with each of the *B. bruxellensis* strains against the respective *B.*  
 267 *bruxellensis* strain.

268 Furthermore, we identified the functional cores of the different inoculation types, defined as those  
 269 nr genes present only in anyone of the replicates of each of the inoculation types. We also identified  
 270 the most abundant genes in each of the samples as those within the top 5% genes with highest  
 271 counts and those present in the two replicates as top abundant were identified.

272

## 273 **Results**

### 274 **Taxonomic profiling**

275 A total of 534,135,264 sequencing reads were produced from all the samples (min= 1,899,372,  
 276 max= 162,426,646, average= 23,223,272.35), from where we obtained 523,937,023 cleaned reads  
 277 (min=1,831,535, max=159,467,366, average=22,779,870.57) (Table 1, Supplemental File 1).

278 Although two replicates were produced for each inoculation type and control, it was not possible to  
 279 extract DNA from one of the replicates of the inoculation with OEP and Brett\_C. Regarding the  
 280 inoculation with only OEN, one of the replicates (OEN\_23) has the lowest number of reads  
 281 (1,899,372). Thus, it was removed from the taxonomic and functional comparisons, as it would not  
 282 capture the low abundant microbes identified by the other samples and it represented an extreme out  
 283 layer in the evaluation of the functional potential profile with a PCA of all the samples due to its  
 284 low sequencing depth (Supplemental Figure 1).

285 The sample OEN\_B\_18 has the highest number of reads (162,426,646), thus it was removed from

the taxonomic comparisons, as it would bias for the identification of the very low abundant species that the other samples would not capture. However, it was not removed from the functional comparisons. Thus, for the taxonomic comparisons, the total number of species level identifications pooling all the samples for the bacterial database was 918 (899 when removing the two out layer samples), 117 plasmids (109 without out layer samples), 18 archaea, 11 viruses, 332 fungi (328 without out layer samples), and 96 protozoa.

### ***Inoculants abundance and functional evaluation***

We evaluated the abundance of *O. oeni* and *B. bruxellensis* in the wines 6 months after inoculation (Table 1). The genome of *O. oeni* is covered at medium and high coverage in the two Brett\_B inoculations (70.65x and 420x). Also, one of the replicates of Brett\_C has the genome of *O. oeni* at high coverage (399.8x), while the other is present in low abundance (14.3x). From the OEP\_A replicates, one has the genome of *O. oeni* covered at medium coverage (43.85x) with the *B. bruxellensis* strain at abundance similar to the other samples, while the other (sample OEP\_A\_10) has *O. oeni* in high abundance (769.5x) and is also the sample with the second most abundant *B. bruxellensis* abundance (66.26x), even higher than the samples where *B. bruxellensis* was inoculated alone. And OEP\_C\_13, which does not have a replicate, has the highest *B. bruxellensis* coverage (105.4x). *B. bruxellensis* was identified among the top abundant fungi only in OEP\_A\_10 and OEP\_C\_13.

To test whether the identified *O. oeni* bacteria in the wines not inoculated with it derive from the native grape flora, we evaluated the amount of MLF in the samples. We identified malic acid in the samples inoculated with OEN and OEP at day 114, but no malic acid in those not inoculated with our *O. oeni* strains (Figure 1).

### ***Bacterial identifications***

In the PCA of the identified bacterial species (Figure 2A), most samples cluster tightly together with the controls, with the most variable samples being from the Brett\_C inoculation and the Brett\_A combined with both *O. oeni* strains. Brett\_C\_8 has the least number of bacterial

identifications (15), however it had much less depth of sequencing than its pair (<25%), but similar sequencing to other samples with more identifications and similar number of identifications to other sample with double sequencing depth (Brett\_A\_3). Similarly, other inoculation types have a total number of identifications uncorrelated to their depth of sequencing. For example, OEP\_A\_10 has the highest number of identifications, and the pair has ~1/6 of its sequencing depth (the sample with second highest sequencing). However, it has similar number than OEN\_A\_15, which has less sequencing than it. Also, the other samples with top highest sequencing have similar number of identifications to the control samples (which have mean depth of sequencing).

### ***Bacterial differential abundance***

Regarding the differentially abundant identifications, OEN is the inoculation type with the lowest number of bacteria present in higher abundance compared to the controls (33, while the mean is 144.6 and median 144), Brett\_A was the second, with 38 taxa, and OEP is the third with 54. In regards to the number of species in less abundance compared to the controls, the inoculations with only Brett\_A have around the average (118, average= 120.1), while OEN has 141 and OEP\_C has the maximum (148) (Figure 2B). Interestingly, while Brett\_A alone is the one changing the least the bacterial community, it is also the one that changes it the most when inoculated together with *O. oeni* (both OEP and OEN). Comparing the patterns of the number of higher and less abundant species of all the inoculation types compared to the control, we observed that all the inoculation types have similar amount of less abundant bacteria, with the largest difference being only in the number of higher abundant bacteria in OEN\_A and OEP\_A. OEP\_A had the highest number of species present in higher abundance compared to the control (412, while the mean is 144.6 and the median is 144), and OEN\_A had the second highest number of species present in higher abundance compared to the control (300). OEN was the one with the lowest number of bacteria present in higher abundance compared to the control (33). Also, compared to Brett\_A, both OEN\_A and OEP\_A have low numbers of differentially less abundant bacteria (24 and 36, respectively). When compared to OEP, OEN has 37 species in differentially higher abundance, and 142 in less

338 abundance.

339 In evaluating the taxonomic core of the inoculations, we found that the core of the OEN\_A  
340 inoculation type is the largest (Figure 3A). We also found that the number of species in the OEP\_A  
341 inoculation type core is not the highest (Figure 3A) while the distance of OEP\_A to the control is  
342 the largest (Figure 2CD).

### 343 ***Abundance correlations and taxonomic distances***

344 The number of positive and negative taxonomic abundance correlations not affected by the  
345 inoculation type (i.e. likely those that are due to the basic wine microbial community interactions)  
346 are almost the same (371 and 384, respectively) (Figure 3B). The inoculation type with the highest  
347 number of correlations disrupted by it is the addition of a *B. bruxellensis* strain (791 affected  
348 correlations), and the number of correlations affected by the OEP – *B. bruxellensis* combinations is  
349 the second highest (617, mean= 530, median= 590.5). Furthermore, the number of correlations  
350 affected by the inoculation of *O. oeni* (187), while the number of affected correlation identified by  
351 the removal of the control samples (241). Furthermore, we did not identify any correlation affected  
352 by taking into account only one specific combination of *O. oeni* and *B. bruxellensis*, but there were  
353 affected correlations identified by taking into account the three possible combinations together for  
354 each *O. oeni* strain.

355 As expected, the distance between the controls is the lowest than that of the other samples  
356 compared to the controls (Figure 2CD). Interestingly, the distances of the samples inoculated only  
357 with *B. bruxellensis* are similar to those of OEN\_A/B/C. The distance values also show that the  
358 inoculation type with the highest difference to the controls is the OEP\_A/B/C, with one of the  
359 OEP\_A replicates being an out layer.

### 360 ***Plasmid and fungal identifications***

361 Similar to the bacterial community, OEP is the closest to the control in the plasmid profiling  
362 (Supplemental Figure 2A). Also, similar to the bacterial profiling, inoculation of Brett\_A to OEN  
363 and OEP causes most plasmids to be in differential higher abundance than inoculation of the *O. oeni*

364 with Brett\_B or Brett\_C. Interestingly, only OEP\_A\_10 is an out layer very distant from the pair,  
 365 with about double number of identifications than the pair, although it has similar number of  
 366 identified plasmids to other samples. Brett\_A\_3 has the fewest plasmids and OEN\_A\_15 has the  
 367 most. However, that is not the one with highest depth, and the ones with highest depth have similar  
 368 number of plasmids as the others with mean depth of sequencing. Furthermore, both Brett\_A\_3 and  
 369 OEN\_A\_15 cluster together within the main cluster.

370 Analysis of the fungal profile clusters tightly together in most of the samples (Supplemental Figure  
 371 2B). The only three samples placed outside the main cluster with the controls are one of the  
 372 replicates of the combinations of OEP with each *B. bruxellensis* strain. To evaluate whether there is  
 373 an increased potential to release HCAs due to fungal activity other than that of *B. bruxellensis*, we  
 374 identified in our nr gene set catalogue sequences of the cinammoyl esterase gene from fungal origin.  
 375 We could only find two genes, one originally annotated as from the yeast *Pichia stipites*. However,  
 376 it was not annotated as esterase, but as triacylglycerol lipase with only 31.8% identity. The other  
 377 gene was originally annotated as from the yeast *Pichia pastoris*; however, it was annotated with  
 378 only 30.5% identity to an uncharacterized protein.

### 379 **Profiling of functional potential**

380 A total of 430,713 genes were predicted, with a mean of 18,726.65 per sample (Supplemental  
 381 Figure 3), and a final nr gene set with all the genes from all the samples pooled was constructed  
 382 containing a total of 70,991 nr genes. After filtering the low abundant ones and removing those  
 383 present only in the removed OEN\_23 sample for the comparative analyses, 50,604 were kept for  
 384 functional annotation. A total of 41,350 of those genes were assigned a KO annotation, and we  
 385 retained 40,525 nr genes after filtering out possible misannotations, accounting for 5,614 different  
 386 KOs. The number of reads of the samples does not have an effect on the number of predicted genes  
 387 (Pearson cor= 0.3667), thus we did not exclude samples from the functional comparative analyses  
 388 based on their sequencing depth (e.g. the sample OEN\_B\_18, which has the highest depth of  
 389 sequencing). However, we excluded sample OEN\_23 because it had the lowest depth of sequencing



and its functional profile was completely an out layer from the other samples, including its replicate pair (Supplemental Figure 1).

We identified a lot of functional potential variability, even within the controls (Figure 4A). OEN clusters close to OEP, which are closer to the control samples than any of the other samples. We identified variation in the functional potential between pairs of similar and different amount of sequencing. For example, the OEN\_B replicates are functionally close in spite of the large difference in sequencing depth (they cluster in the same tight cluster not containing the controls). The two OEN\_C replicates separate in two different tight clusters not containing the control samples and the two OEP\_A replicates separate into two different clusters, one being a tight cluster containing OEP\_A\_9, and a looser one containing the control samples and OEP\_A\_10. This OEP\_A pair is among the pairs most distant to each other. Furthermore, the sample with the least number of assembled nr genes was Brett\_B\_6 (9,184) and OEP\_A\_10 had the highest (41,618), although its depth of sequencing was not the lowest. The sample with the lowest depth of sequencing (OEN\_23) and that with the highest (OEN\_B\_18) had assembled around the mean number of nr genes (14,078 and 19,651, respectively, mean= 18,219.39).

### ***Differentially abundant functions***

We found that most of the differentially abundant KOs compared to the control are in lower abundance (average higher abundance= 1,221.8, median higher abundance= 1,153, average less abundance= 1,676.2, median less abundance= 1,531). However, when assigning the KOs to pathways, more pathways are affected by KOs in higher abundance (average= 36.1, median= 25) than by those in lower abundance (average= 23, median= 10). Compared to the other inoculation types, Brett\_A has the highest number of differentially abundant KOs in higher abundance (2,748). Brett\_A, OEP\_A, OEN and OEN\_C are the ones where there are more KOs in higher than in less abundance. However, OEN\_A does not follow the same pattern of Brett\_A and OEP\_A (Figure 5A). We found that the inoculation only Brett\_B and OEN\_B had the highest numbers of differentially less abundant KOs compared to the control (3,481 and 3,582, respectively, average= 1,676.7,

416 median= 1,531). OEP\_B (2,757) is in the fourth place, with OEP\_C in the third (3,200). *O. oeni*\_B  
 417 compared to Brett\_B are the ones with the lowest number of KOs in differential less abundance  
 418 compared to *O. oeni*\_A/C, and OEN\_B is the one with least KOs in higher abundance (335),  
 419 although OEP\_B is the one with the highest number of KOs present in higher abundance (1, 519).  
 420 Brett\_C has a similar number of higher and less abundant KOs (1,229 and 1,531, respectively) both  
 421 around the means of higher and less of all the samples compared to the control (1,221.8 and  
 422 1,676.7, respectively). However, OEN\_C is the second with the highest number of KOs present in  
 423 higher abundance (2,006), and OEP\_C is the third with highest number of KOs present in less  
 424 abundance (3,200).  
 425 OEP has the least number of higher and less abundant KOs (24 and 39, respectively) compared to  
 426 the control, while inoculations with only Brett\_B and OEN\_B had the highest numbers of  
 427 differentially less abundant KOs compared to the control (3,481 and 3,582, respectively, average=  
 428 1,676.7, median= 1,531). Compared to OEP, OEN has more KOs present in higher abundance (956)  
 429 than present in lower abundance (29). However, when looking at the pathways those KOs belong to  
 430 (Figure 5B), only 10 pathways in higher and 10 in less abundance are identified, while the average  
 431 is 36.14 as present in higher abundance, and 23 in lower abundance. Both replicates of inoculating  
 432 only with OEP and OEN have the lowest total of differentially abundant KOs (63 and 1,477,  
 433 respectively), while the inoculations with only *B. bruxellensis* have larger numbers of differentially  
 434 abundant KOs. When analysing the pathways differentially abundant in only a given inoculation  
 435 type derived from differentially abundant KOs, the comparisons of both OEP\_C and OEN\_C have  
 436 the highest number of differentially less abundant pathways (52) (Figure 5C), with most of those  
 437 differentially abundant KOs coming from OEP\_C (2,068, while OEN\_C has 593).

### 438 ***Core and top abundant genes***

439 Out of the 40,525 annotated filtered nr genes, only 867 are present in all the compared samples.  
 440 From all the *B. bruxellensis* and *O. oeni* – *B. bruxellensis* combinations, Brett\_A has the highest  
 441 number of genes in its core (i.e. present in the two replicates of the inoculation type), with only 15.

Inoculations of Brett\_A alone have only 1 core gene (annotated as coming from *Candida glabrata*), while the other two inoculations of Brett\_B and Brett\_C have zero genes in the core. The *O. oeni*\_B inoculations do not have genes in the core either, while *O. oeni*\_C has only 9. OEN has only 16 core genes, much less core genes than OEP (329), but still in the third place compared to the other inoculation types. It is interesting that although OEP is the closest to the control, it is the second with the highest number of genes in its core (329, median= 2, mean= 67.15). As expected, the control samples are the ones with most genes in its core (515).

A total of 1,582 different nr genes were found among the top abundant genes ( $P < 0.05$ ) of all the inoculation types. The percentage of top abundant genes present in both replicates of each type of inoculation is in average 53.49% (median of 49.64%), highlighting the variability in the wine microbial community. OEN\_A has the lowest number of replicable genes present in top abundance in both replicates (Figure 5D) (only 5 genes), while both replicates have around the mean number of top abundant genes (580 and 646, mean=627.67). Notably, OEN\_B has the highest percentage of replicable top abundant genes from the replicates (80.2%, 355, each replicate has 438 and 447, which are below the mean and median).

## HCA derivatives

To evaluate whether an increase in the release of HCA has the potential to produce more off-flavour compounds, we looked for genes in our nr gene set catalogue involved in the processing of HCAs. We identified a gene from *Erwinia gerundensis* (a cosmopolitan epiphyte) with 35.294% identity annotated with the KO K13727 (phenolic acid decarboxylase), which has decarboxylation activity on HCAs ferulic, p-coumaric and caffeic acids. This same gene had a second putative annotation with 73.864% identity to an unannotated protein from *Nectria haematococca* (*Fusarium solani* subsp. pisi), which is a fungal plant pathogen. This gene was also found to be significantly more abundant in Brett\_A compared to Brett\_B (FDR=  $4.16 \times 10^{-10}$ ), OEP\_A (FDR= 0.0138), OEN\_A (FDR=  $6.13 \times 10^{-5}$ ), and control (FDR=  $2.91 \times 10^{-8}$ ). It was also more abundant in Brett\_C than in OEP\_C (FDR= 0.00027) and the control (FDR=  $4.54 \times 10^{-7}$ ), in OEN\_C than in OEN (FDR=  $1.27 \times 10^{-11}$ ) and in control

(FDR=  $3.22e^{-11}$ ), and in OEP\_A than in OEP (FDR=0.0014) and control (FDR=0.0012). We also identified another KO related to the carboxylation of HCAs among our assembled genes; K20039 (ferulic acid decarboxylase 1-like) from *S. cerevisiae*, which was in significant higher abundance in OEP\_A compared to Brett\_A (FDR= 0.00014) and in OEP\_B compared to Brett\_B (FDR= 0.02). Also, some genes with this KO were identified as less abundant in OEP\_B and OEP\_C compared to OEP (FDR= 0.01 and FDR=  $3.82e^{-9}$ , respectively), and the control (FDR= 0.013, FDR=  $2.10e^{-9}$ , respectively). Other genes annotated as ferulic acid decarboxylase 1-like were in significant less abundance in OEN\_A/B/C compared to OEN (FDR=  $2.1e^{-10}$ , FDR=  $5.25e^{-8}$ , FDR=  $4.17e^{-8}$ , respectively) and the control (FDR=  $1.19e^{-7}$ , FDR=  $1.88e^{-5}$ , FDR=  $8.92e^{-6}$ ), and less abundant in the Brett\_A/B/C compared to the control (FDR=  $1.99e^{-6}$ , FDR=  $3.55e^{-7}$ , FDR=  $1.23e^{-8}$ , respectively).

478

## 479 Discussion

### 480 Microbial taxonomic and functional potential profiling

#### 481 *General wine-related identifications*

482 Among the taxonomic identifications, we found expected bacteria derived from soil and plants, 483 such as *Xanthomonas alfalfa*, *Dyella japonica* and *Micrococcus luteus* (found on the surface of 484 table grapes). We also identified wine spoilage bacteria, such as *Aeromonas hydrophila* in various 485 samples. In regards to the number of bacterial identifications, it is interesting to note that we found 486 *Bodo saltans* (*Pleuromonas jaculans*) in top abundance in OEP\_B\_12 (at 308.2x coverage), 487 OEN\_24 (126.57x), both OEN\_C replicates, OEN\_A\_16, and Brett\_A\_3 (mean coverage of 21.57x). 488 It is a free-living nonparasitic protozoan which feeds upon bacteria which can be found in 489 freshwater and marine environments. These samples that have it in top abundance also have less 490 bacterial identifications compared to the rest or compared to their respective pair. However, the 491 causal relationship cannot be identified, although it deserves further study.

492 Among the top abundant bacteria identified in OEP combined with a *B. bruxellensis* strain, we 493 found several LAB that are examples of bacteria being promoted as an effect of the use of a specific

494 *O. oeni* strain with *B. bruxellensis*. For instance, we identified *Lactobacillus collinoides*, a LAB  
 495 found in cider, in one of the replicates of each OEP\_A/B/C combination in higher abundance  
 496 compared to the respective *B. bruxellensis* strain and to OEP and the controls. In similar differential  
 497 abundance pattern, we found among the top abundant bacteria *Lactobacillus crustorum*, isolated  
 498 from two traditional Belgian wheat sourdoughs, *Lactobacillus herbarum*, a species related to  
 499 *Lactobacillus plantarum*, *Lactobacillus oeni*, LAB isolated from wine, and *Lactobacillus*  
 500 *paucivorans*, isolated from a brewery environment. Among the top abundant bacteria identified in  
 501 higher differential abundance in each OEP\_A/B/C compared to the respective *B. bruxellensis* strain,  
 502 to OEP and the controls, we identified *Lactobacillus nagelii*, isolated from a partially fermented  
 503 wine, and *Lactobacillus parafarraginis*, a heterofermentative lactobacilli isolated from a compost of  
 504 distilled shochu residue.

505 Among the fungi in differentially higher abundance in OEN\_A when compared to Brett\_A, OEN  
 506 and the control, and in OEN\_B/C when compared to OEN, we identified *Talaromyces stipitatus*.  
 507 This fungus contains genes with high identity to those needed for the biosynthesis of the red  
 508 pigment monascorubrin by the phylogenetic relative fungi *Talaromyces marneffeii*. Interestingly, we  
 509 also identified *T. marneffeii* differentially abundant only in in OEP\_C when compared to Brett\_C,  
 510 OEP and control. As expected, we also identified other grape-related fungi, such as the plant  
 511 pathogens *Verticillium dahlia* and *Verticillium longisporum*, *Mucor ambiguus*, present in soil and  
 512 plants, and the wine common yeast *Saccharomyces cerevisiae* and *Lachancea kluyveri* (found in the  
 513 core of OEP\_C).

514 In regards to AF, we identified in various samples the fungi *Mucor indicus*, previously isolated  
 515 from the traditional fermented Indonesian food tempeh, and with the capability of producing  
 516 ethanol is comparable with that of *S. cerevisiae*. Also, in one OEP\_C sample we identified *Candida*  
 517 *sorboxylosa*, an ethanol producing and tolerant yeast species from fruits for production of bio-  
 518 ethanol that is common to the winery environment.

519 ***Microbial community identification comparisons***

520 We identified no malic acid on day 114 in the samples not inoculated with our *O. oeni* culture  
521 strains (Figure 1), suggesting that the found high coverage of *O. oeni* in the samples not inoculated  
522 with them (one replicate of Brett\_A and Brett\_C, and the two Brett\_B replicates) derives from *O.*  
523 *oeni* present in the native grape flora. From the three tested *B. bruxellensis* strains, Brett\_B seems to  
524 be unable to grow in these wines, because when inoculated alone it was identified at only 0.4x, and  
525 when inoculated with *O. oeni*, it was identified in very low abundance (Table 1, Supplemental File  
526 1). The difference in the genome depths of coverage in the replicates of the *O. oeni* and *B.*  
527 *bruxellensis* strains inoculated together suggest that *B. bruxellensis* sometimes grows well and  
528 sometimes not, depending on certain unidentified conditions. Such inability to predict with  
529 precision the activity of a spoilage yeast and its effect on the entire microbial community highlights  
530 the importance in wine-making of inoculating with sufficient numbers of strong and viable yeast  
531 and bacteria to ensure the presence of the desired microbial community (Gerbaux et al. 2009).  
532 In the identification of bacterial species from plasmids, all the inoculation types seem to have an  
533 effect on the community compared to the controls, while on the bacterial community there was an  
534 effect only for certain inoculation types. This suggests that the plasmids presence is inherently  
535 variable, although to a low extent. The fact that OEP\_A\_10 has similar number of identified  
536 plasmids to other samples in spite of being an out layer very distant from the pair (with about  
537 double number of identifications than the pair) suggests that the difference in the plasmid profile  
538 resides on the bacterial community (the plasmids hosts). Also, the differences in the number of  
539 plasmids identified in the samples compared to their depth of sequencing, suggests that the number  
540 of identifications is not mainly due to depth of sequencing.

541 Interestingly, while the number of reads of the samples has a moderate influence on the number of  
542 identified taxa (Pearson cor=0.6832), it does not have an effect on the number of identified genes  
543 (Pearson cor= 0.3667). Furthermore, the number of identified taxa has a moderate correlation to the  
544 number of identified genes (Pearson cor= 0.6854), and the number of nr genes directly correlates  
545 with the number of genes in all the samples (Pearson cor= 0.997) (Supplemental Figure 3). This

suggests that the functional potential space of the wine microbiome is more defined than the taxonomic profile. However, we also identified functional potential variation between pairs of similar and different amount of sequencing, suggesting that the observed variability in the functional potential is not due to differences in depth of sequencing. Interestingly, the variability is such that even the controls do not cluster tightly together as in the taxonomic PCAs. But, similarly to the impact of *B. bruxellensis* in the taxonomic identifications, most of the impact when *O. oeni* is inoculated occurs when combining it with a *B. bruxellensis*, as OEN and OEP are the closest to the control samples. These results suggest that the main changes in the wine microbial community occur when *B. bruxellensis* is present.

In contrast to the taxonomic profiling, where most of the taxa of the different inoculation types compared to the control was in statistically significant higher abundance, at the functional level most of the differentially abundant KOs compared to the control are in less abundance. However, the assignment of the KOs to pathways showed that more different pathways are affected by KOs in higher abundance than by those in less abundance. This suggests that there is a need of a minimum set of present pathways required by the wine microbiome to thrive in that particular system; such minimum set can be perturbed by changes in the component KOs, however such changes do not disrupt the entire pathway. Elimination of the presence of a KO (i.e. differentially less abundant KO) is more disruptive to a pathway than a KO being present in higher abundance.

The fact that only the control and OEP have a large number of genes as core, but that the OEP and the control samples are functionally the closest types of inoculation, suggests that the main effect on the functional profiles of the different inoculations is not in the integration of new functions, but in changes in their abundance.

#### ***O. oeni* - *B. bruxellensis* strain specific dependent effect**

We observed that in general, the samples inoculated with *B. bruxellensis* have less bacterial identifications (mean 71, average all samples 152.4, median all samples 129) than the ones inoculated with an *O. oeni* strain (Supplemental File 1). This suggestion is supported by the



572 correlation abundance results. If the effect of the addition of a *B. bruxellensis* strain is the  
573 elimination of several taxa, it would be expected that most of the affected correlation were those  
574 that used to be positive. Effectively, 79.6% of the affected correlations were positive.  
575 The fact that both replicates of inoculating only with OEP and OEN cluster together with the  
576 controls and have the lowest total of differentially abundant KOs (63 and 1477, respectively), while  
577 the inoculations with only *B. bruxellensis* strains have larger numbers of differentially abundant  
578 KOs, suggests that most of the functional potential impact is given by the *B. bruxellensis* strain than  
579 by the *O. oeni* strain.

580 Also, the clustering patterns on the PCA of the taxonomic identifications suggest that the  
581 combination of *O. oeni* and *B. bruxellensis* has an impact on the bacterial composition depending  
582 on the strains being combined, both between and within inoculation types. It also suggests that in  
583 some instances the presence of more of low abundant bacteria and difference in abundance of the  
584 same bacteria accounts for the variation within the same inoculation type, rather than a radical  
585 change in the bacterial composition.

586 The observation that *O. oeni* and *B. bruxellensis* have an impact on the bacterial composition  
587 depending on the specific strains being combined, both between and within inoculation types, is  
588 supported by the abundance correlation analyses. Correlations were not affected when taking into  
589 account only one specific combination of *O. oeni* and *B. bruxellensis*, but when taking into account  
590 the three possible combinations together for each *O. oeni* strain. In other words, the effect of  
591 OEP\_A is not the same as that of OEP\_B and OEP\_C, and also that of OEN\_A is not the same as  
592 OEN\_B and OEN\_C. Also, when looking at the functional potential evaluation, we found that  
593 compared to the other inoculation types, Brett\_A and OEP\_A are among those with the highest  
594 number of differentially higher abundant KOs. However, OEN\_A does not follow the same pattern  
595 of Brett\_A and OEP\_A. This further supports the suggestion that the functional impact of Brett\_A  
596 depends on the *O. oeni* it interacts with (Figure 5A).

597 Interestingly, in spite of the observation that OEN\_B is the one with least KOs in greater abundance

598 while OEP\_B is the one with the highest number of KOs present in higher abundance, the  
 599 inoculations of only Brett\_B, OEN\_B, and OEP\_B are among the samples with the highest numbers  
 600 of differentially less abundant KOs compared to the control. This suggests that Brett\_B reduces the  
 601 functional potential of the system, regardless of the *O. oeni* it is inoculated with. On the other hand,  
 602 Brett\_C has a similar number of higher and less abundant KOs compared to the control. However,  
 603 OEN\_C is the second with the highest number of KOs present in higher abundance and OEP\_C is  
 604 the third with highest number of KOs present in less abundance. This suggests that the effect of  
 605 Brett\_C on the functional potential depends on the *O. oeni* strain.

606 Notably, although OEN\_A and OEN\_C have the least number of replicable top abundant genes, the  
 607 OEN\_B samples have the highest percentage of replicable top abundant genes, suggesting that the  
 608 OEN\_B functional profile is more replicable and less variable than that of the other inoculation  
 609 types, again highlighting the different impact in the microbial communities that *O. oeni* strains have  
 610 depending on the *B. bruxellensis* strain present.

611 The observation that the inoculations of Brett\_A together with both OEN and OEP have low  
 612 numbers of differentially less abundant bacteria suggests that the inoculation of Brett\_A with *O.*  
 613 *oeni* seems to impact the community by allowing the growth of more bacterial taxa instead of by  
 614 repressing their growth. Although the large variability within the OEP\_A inoculation type is likely  
 615 due to the ability of the Brett\_A to grow poorly or successfully with OEP, this same effect is not  
 616 observed in OEN\_A, because in OEN\_A one replicate grew more than the other, but the core of the  
 617 OEN\_A inoculation type is the largest (Figure 3A). Among them, we found *Lactobacillus*  
 618 *paracollinoides*, isolated from brewery environments, *Lactobacillus pentosus*, the most prevalent  
 619 lactic acid bacterium in Spanish-style green olive fermentations, and *Staphylococcus equorum*,  
 620 frequently isolated from fermented food products and contributing to the formation of aroma  
 621 compounds during ripening, especially in cheeses and sausages.

## 622 ***O. oeni* strain specific effect**

623 OEN had the lowest number of bacteria present in higher abundance compared to the control, and

OEP is the closest to the control and is among the inoculation types with least bacteria present in higher abundance. This suggests that the inoculation type that affects the least the wine microbial profile (after 6 months of inoculation) is that of a single *O. oeni* strain. This is supported by the microbial abundance correlation analyses, where the number of correlations affected by the inoculation of *O. oeni* is close to the number of affected correlation identified by the removal of the control samples. Furthermore, OEP has the least number of higher and less abundant KOs compared to the control, and its functional potential diversity clusters together with the controls (Figures 4B, 5A), suggesting that OEP causes the least change in the functional potential compared to the other inoculation types. Compared to OEP, OEN has more KOs present in higher abundance than present in less abundance, however, when looking at the pathways those KOs belong to (Figure 5B), only 10 pathways in higher and 10 in less abundance are identified. These observations suggest that the degree of functional impact of those *O. oeni* strains alone is similar.

We observed low numbers of replicable genes present in the 5% top abundant genes in both replicates of OEN\_A (Figure 5D), although they have around the mean number of top abundant genes. This is likely due to the difference in abundance of *O. oeni*; one of the replicates had *O. oeni* in high abundance, while the other had the *O. oeni* in very low abundance and the *B. bruxellensis* in moderate abundance.

### ***The effect of the abundance of B. bruxellensis***

Interestingly, in the viral profiling, in OEN\_A we identified in higher abundance compared to the control two viruses against fungi, *Phytophthora infestans* RNA virus 1 and *Saccharomyces cerevisiae* killer virus M1 (also in higher abundance in OEN\_B). It could be that these viruses contribute to a reduction of the fungal diversity in this OEN – *B. bruxellensis* combinations compared to those combined with OEP, where fungal diversity seems to be increased. However, this would need further experimental validation.

Notably, when checking the pathways differentially abundant in only a given inoculation type derived from differentially abundant KOs, the comparisons of *O. oeni*\_C versus Brett\_C have the

highest number of differentially less abundant pathways (Figure 5C), with most of those differentially abundant KOs coming from OEP\_C. This suggests that OEP combined with a successfully growing Brett\_C causes a large impact on the functional potential of the wine microbial community. Among the differentially abundant pathways present in less abundance in the comparisons of *O. oeni*\_C versus Brett\_C is the regulation of mitophagy in yeast, with all the KOs of the pathway in less abundance in OEP\_C, possibly suggesting there is less potential of regulation of the fungal taxonomic profile in OEP\_C. This is interesting, as the fungal profile in OEP\_C is the second with the highest number of differentially more abundant fungal species when compared to the control (61, while the mean is 30.54 and median is 14).

The observation that OEP alone is closest to the control in the taxonomic profiling, and that it has a strong effect on the bacterial profile when *B. bruxellensis* is in high abundance is notable, given that HCAs have been shown to inhibit the growth of many microorganisms (Kheir et al. 2013).

Furthermore, there is evidence that the concentration of 4-ethylphenol and 4-ethylguaiacol is lower when malolactic bacteria are present before exposure to *Brettanomyces*, so that it has been suggested to inoculate with commercially available strains as the time needed for spontaneous MLF is unpredictable giving prolonged risk for exposure of *B. bruxellensis* (Nielsen & Richelieu 1999).

## Flavour potential

### *Taxonomic and functional potential identifications*

In regards to taxonomic identifications related to flavour formation in wine, we found only in the OEP\_C sample the bacterium *Lactobacillus diolivorans* (176 mapping reads), which degrades 1,2-propanediol, a compound that is nearly odourless but that possesses a faintly sweet taste. Also, only in this sample we found the fungi *Clavispora lusitaniae* (596 mapping reads), which has been found to produce a good balance between concentrations of ethyl acetate (sweet smell) and high alcohols.

In regards to potential functions, the  $\beta$ -glucosidase activity is involved in the hydrolysis of several important compounds for the development of varietal wine flavour profiles, and microbial  $\beta$ -glucosidases have been used for the enhancement of wine aroma. Importantly, glucosydases not

encoded by *S. cerevisiae* have been shown to impact the flavour compounds profile in wine (Rosi et al. 1994). In our nr gene set we identified 53 genes annotated as KO K05349 (bglX; beta-glucosidase) from many different bacteria and non-*Saccharomyces* yeast. One of them is in top abundance in various samples and is annotated as coming from *O. oeni*. However, sensorial evaluation is required to assess the impact in the wine flavour due to these identified genes.

# **MLF**

To evaluate whether the presence of *B. bruxellensis* affects the occurrence of MLF, and thus its effect in reducing the acidity of the wine, we looked for genes annotated as malate dehydrogenase (*mdh*) in our nr gene set. We identified *mdh* in differential abundance in various comparisons and coming from various species, including *O. oeni*. As expected, the two genes annotated as *mdh* and D-lactate dehydrogenase from *O. oeni* are in the top abundant in all the samples inoculated with *O. oeni* strains and *O. oeni* combined with a *B. bruxellensis* strain, and also in Brett\_B/C. Thus, the presence of the analysed *B. bruxellensis* strains does not affect the MLF activity of the evaluated *O. oeni* strains.

# **HCA production**

The cinnamoyl esterase activity can also be present in different fungi, suggesting that under certain unidentified conditions, the variability of fungi promoted by the combination of OEP with a well growing *B. bruxellensis* could possess this esterase activity and contribute to the increase in the production of HCAs. However, we could only find two yeast genes with inconclusive functional annotations. Thus, it cannot be concluded that there is a higher production of HCA due to the potential activity of other fungi, further experimental functional characterization should be performed on these identifications to validate whether they confer the cinnamoyl esterase activity. The observations from the abundances of the phenolic acid decarboxylase and ferulic acid decarboxylase 1-like genes also suggest that the presence of genes with putative decarboxylase activity on HCAs is not dependent on the presence of a specific *O. oeni* strain with or without the esterase activity, but on the *B. bruxellensis* strain, because it is also in the control samples and

because Brett\_A has higher abundance of phenolic acid decarboxylase than OEP\_A.

# Conclusions

In this study, we characterized the impact on the microbial community of a Cabernet Sauvignon wine six months post-inoculation of two different strains of *O. oeni* (with and without the cinnamoyl esterase activity) and three *B. bruxellensis* strains, alone and in combination. We found that the impact in the taxonomic profile and functional potential of the microbiome due to the *O. oeni* – *B. bruxellensis* combinations depends on i) the specific *O. oeni* and *B. bruxellensis* strains being combined, and ii) the abundance reached by the inoculants, which depends on certain unidentified conditions. Analysis of the functional potential of the system identified that changes in the abundance of the genes is the general effect of the inoculations, not integration of new functions. OEP maintains the stability of the most abundant functions in the system in spite of the addition of the *B. bruxellensis*. The functional potential for the HcD activity is dependent on the *B. bruxellensis* strain; however, the control samples also have this potential, not derived from the inoculated *B. bruxellensis* nor from the *O. oeni* strains. Furthermore, it was not possible to identify non-Brettanomyces fungal potential to produce HCAs as a result from a particular inoculation type. Finally, the HCAs post processing into off-flavor compounds is not dependent on the *O. oeni* but on the *B. bruxellensis* strain and other microbes, likely derived from the indigenous grape flora. This study proves the usefulness of metagenomic analysis in obtaining a deeper insight into the general microbial profile characteristics and the impact of specific inoculants, not only in the taxonomy, but also in the functional potential of the system. However, experimental validation will be necessary in future studies to obtain a detailed knowledge of the specific mechanisms of the interactions identified with metagenomic analyses. Also, sensorial analysis would be necessary to evaluate the impact on the flavor profile of the wines produced by the potential unveiled by the metagenomic results.

## 728 **Acknowledgements**

729 MLZM, MAK and LP thank the Danish National Advanced Technology Foundation  
730 (Højteknologifonden) 080-2012-3-Food genomics and Innovation Fund Denmark case number  
731 6150-00033A FoodTranscriptomics for funding the research. The authors declare no conflict of  
732 interests. We thank the Danish National High-Throughput DNA Sequencing Centre for the  
733 generation of the sequencing data. We gratefully acknowledge the Danish National Supercomputer  
734 for Life Sciences – Computerome (computerome.dtu.dk) for the computational resources to perform  
735 the sequence analyses. The sequencing data reported in this paper will be archived in a public  
736 database (ID added upon paper acceptance).

737 Short version of title: *O. oeni* - *B. bruxellensis* impact on wine microbiome

738

## 739 **Literature Cited**

740 Barata A et al. 2008. Ascomycetous yeast species recovered from grapes damaged by honeydew  
741 and sour rot. Journal of applied microbiology 104(4):1182–91.

742 Barata A, Malfeito-Ferreira M and Loureiro V. 2012. The microbial ecology of wine grape berries.  
743 International Journal of Food Microbiology 153(3):243–259.

744 Bokulich NA et al. 2014. Microbial biogeography of wine grapes is conditioned by cultivar,  
745 vintage, and climate. Proceedings of the National Academy of Sciences of the United States of  
746 America 111(1):E139-48.

747 Bouzanquet Q et al. 2012. A Novel Glutathione-Hydroxycinnamic Acid Product Generated in  
748 Oxidative Wine Conditions. Journal of Agricultural and Food Chemistry 60(49):12186–12195.

749 Branco P et al. 2014. Identification of novel GAPDH-derived antimicrobial peptides secreted by  
750 *Saccharomyces cerevisiae* and involved in wine microbial interactions. Applied Microbiology and  
751 Biotechnology 98(2):843–853.

752 Cabrita MJ et al. 2008. Impact of malolactic fermentation on low molecular weight phenolic  
753 compounds. Talanta 74(5):1281–1286.



754 Edgar RC. 2010. Search and clustering orders of magnitude faster than BLAST. *Bioinformatics*  
755 (Oxford, England) 26(19):2460–1.

756 De Filippis F, Parente E and Ercolini D. 2017. Metagenomics insights into food fermentations.  
757 *Microbial Biotechnology* 10(1):91–102.

758 Gerbaux V et al. 2009. Influence of Inoculation with Malolactic Bacteria on Volatile Phenols in  
759 Wines. *American Journal of Enology and Viticulture* 60(2):233–235.

760 Harris RS. 2007. Improved Pairwise Alignment of Genomic DNA. ProQuest.

761 Hernández T et al. 2006. Phenolic compounds in red wine subjected to industrial malolactic  
762 fermentation and ageing on lees. *Analytica Chimica Acta* 563(1–2):116–125.

763 Hixson JL et al. 2012. Hydroxycinnamic Acid Ethyl Esters as Precursors to Ethylphenols in Wine.  
764 *Journal of Agricultural and Food Chemistry* 60(9):2293–2298.

765 Hyatt D et al. 2010. Prodigal: prokaryotic gene recognition and translation initiation site  
766 identification. *BMC bioinformatics* 11:119.

767 Kheir J et al. 2013. Impact of volatile phenols and their precursors on wine quality and control  
768 measures of *Brettanomyces/Dekkera* yeasts. *European Food Research and Technology* 237(5):655–  
769 671.

770 Kikuzaki H et al. 2002. Antioxidant properties of ferulic acid and its related compounds. *Journal of*  
771 *agricultural and food chemistry* 50(7):2161–8.

772 Leff JW et al. 2013. Bacterial Communities Associated with the Surfaces of Fresh Fruits and  
773 Vegetables. *PLoS ONE* 8(3):e59310.

774 Li H and Durbin R. 2009. Fast and accurate short read alignment with Burrows-Wheeler transform.  
775 *Bioinformatics* (Oxford, England) 25(14):1754–60.

776 Liu SQ. 2002. A review: malolactic fermentation in wine -- beyond deacidification. *Journal of*  
777 *applied microbiology* 92(4):589–601.

778 Liu Y et al. 2017. Wine microbiome: A dynamic world of microbial interactions. *Critical Reviews*  
779 *in Food Science and Nutrition* 57(4):856–873.

780 Lonvaud-Funel A. 1999. Lactic acid bacteria in the quality improvement and depreciation of wine.  
781 Antonie van Leeuwenhoek 76(1–4):317–31.  
782 Madsen MG et al. 2016. Influence of *Oenococcus oeni* and *Brettanomyces bruxellensis* on  
783 Hydroxycinnamic Acids and Volatile Phenols of Aged Wine. American Journal of Enology and  
784 Viticulture doi: 10.5344/ajev.2016.16015.  
785 Martin M. 2011. Cutadapt removes adapter sequences from high-throughput sequencing reads.  
786 EMBnet.journal 17(10).  
787 Meyer M and Kircher M. 2010. Illumina sequencing library preparation for highly multiplexed  
788 target capture and sequencing. Cold Spring Harbor protocols 2010(6):pdb.prot5448.  
789 Nagel CW and Wulf LW. 1979. Changes in the Anthocyanins, Flavonoids and Hydroxycinnamic  
790 Acid Esters during Fermentation and Aging of Merlot and Cabernet Sauvignon. American Journal  
791 of Enology and Viticulture 30(2):111-116.  
792 Nielsen JC and Richelieu M. 1999. Control of flavor development in wine during and after  
793 malolactic fermentation by *Oenococcus oeni*. Applied and environmental microbiology 65(2):740–  
794 5.  
795 Ou S and Kwok KC. 2004. Ferulic acid: pharmaceutical functions, preparation and applications in  
796 foods. Journal of the Science of Food and Agriculture 84(11):1261–1269.  
797 Peng Y et al. 2012. IDBA-UD: a de novo assembler for single-cell and metagenomic sequencing  
798 data with highly uneven depth. Bioinformatics (Oxford, England) 28(11):1420–8.  
799 Petersen TN et al. 2017. MGmapper: Reference based mapping and taxonomy annotation of  
800 metagenomics sequence reads. PLOS ONE 12(5):p.e0176469.  
801 Pina C et al. 2004. Ethanol tolerance of five non-Saccharomyces wine yeasts in comparison with a  
802 strain of *Saccharomyces cerevisiae* influence of different culture conditions. Food Microbiology  
803 21(4):439–447.  
804 Rosi I, Vinella M and Domizio P. 1994. Characterization of beta-glucosidase activity in yeasts of  
805 oenological origin. The Journal of applied bacteriology 77(5):519–27.

806 Rumbold K et al. 2003. Purification and properties of a feruloyl esterase involved in lignocellulose  
807 degradation by *Aureobasidium pullulans*. *Applied and environmental microbiology* 69(9):5622–6.  
808 Sieuwerts S et al. 2008. Unraveling microbial interactions in food fermentations: from classical to  
809 genomics approaches. *Applied and environmental microbiology* 74(16):4997–5007.  
810 Sipiczki M. 2006. *Metschnikowia* strains isolated from botrytized grapes antagonize fungal and  
811 bacterial growth by iron depletion. *Applied and environmental microbiology* 72(10):6716–24.  
812 Suarez R et al. 2007. The production of ethylphenols in wine by yeasts of the genera *Brettanomyces*  
813 and *Dekkera*: A review. *Food Chemistry* 102(1):10–21.

814

815

816

817

818

819

820

821

822

823

824

825

826

827

828

829

830

831

# Tables

**Table 1. Statistics of the sequencing and the mapping to the genomes of the inoculants.**

| Sample    | Cleaned reads | % Unmapped reads | <i>O. oeni</i> * coverage | <i>B. bruxellensis</i> ** coverage |
|-----------|---------------|------------------|---------------------------|------------------------------------|
| Control_1 | 3,317,232     | 21               | 2.75                      | 0.35                               |
| Control_2 | 5,195,056     | 15.23            | 4.45                      | 0.88                               |
| Brett_A_3 | 4,107,740     | 8.54             | 1.15                      | 26.3                               |
| Brett_A_4 | 6,695,169     | 8.41             | 18.1                      | 38.7                               |
| Brett_B_5 | 2,761,092     | 2.08             | 70.65                     | 0.4                                |
| Brett_B_6 | 10,993,754    | 2.04             | 420                       | 0.45                               |
| Brett_C_7 | 13,827,278    | 3.25             | 399.8                     | 23.27                              |
| Brett_C_8 | 2,054,860     | 4.35             | 14.35                     | 12.97                              |
| OEP_A_9   | 8,067,295     | 7.9              | 43.85                     | 27.2                               |
| OEP_A_10  | 65,488,400    | 5.54             | 769.5                     | 66.26                              |
| OEP_B_11  | 59,758,655    | 1.91             | 2369.1                    | 7.9                                |
| OEP_B_12  | 19,900,342    | 1.89             | 216.25                    | 3.37                               |
| OEP_C_13  | 39,001,458    | 3.59             | 945.75                    | 105.4                              |
| OEN_A_15  | 43,950,984    | 4.27             | 1333                      | 21                                 |
| OEN_A_16  | 6,728,890     | 10.18            | 4.3                       | 44.6                               |
| OEN_B_17  | 37,224,934    | 2.12             | 1280.85                   | 2.12                               |
| OEN_B_18  | 159,467,366   | 2.08             | 4621.2                    | 13                                 |
| OEN_C_19  | 6,443,410     | 6.41             | 1.25                      | 37.4                               |
| OEN_C_20  | 6,458,253     | 6.19             | 110.5                     | 26.3                               |
| OEP_21    | 65,477,885    | 1.17             | 5.8                       | 1.29                               |
| OEP_22    | 6,451,292     | 9.15             | 8.785                     | 1.23                               |
| OEN_23    | 1,831,535     | 51               | 0.635                     | 0.13                               |
| OEN_24    | 7,664,243     | 3.6              | 47.25                     | 0.9                                |

\*Reported mapping statistics for *O. oeni* derive from the average of the mapping versus the genomes of OEP and OEN. \*\*Reported mapping statistics for *B. bruxellensis* derive from mapping versus the publicly available genome of Brett\_C strain.

# Figures

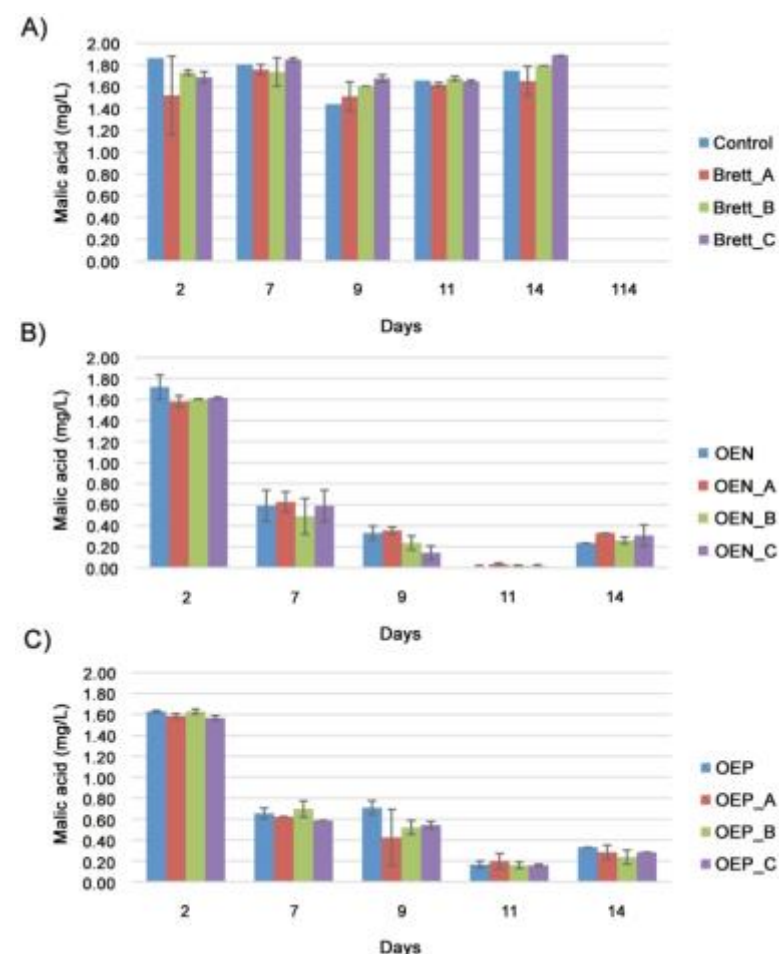

**Figure 1. Concentration of malic acid (g/L) over time (days).** Malic acid concentrations are average values of duplicates. Error bars are standard deviations. A) Malic acid concentration on inoculations with *B. bruxellensis* strain A, B or C. The concentrations on day 114 were 0 mg/L malic acid in all inoculations, suggesting any identified *O. oeni* in those samples are not able to perform MFL, and are thus likely derived from the grape flora. B) Wines inoculated with OEN and *B. bruxellensis* strain A, B or C. C) Wines inoculated with OEP and *B. bruxellensis* strain A, B or C.



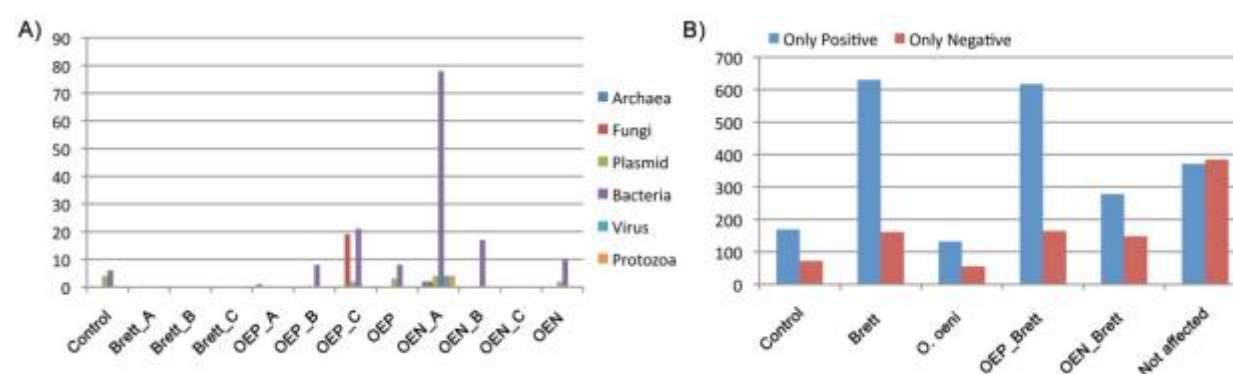

**Figure 3. Taxonomic profiling.** A) Microbial species taxonomic cores (i.e. the taxa present only in anyone of the replicates of each of the inoculation types). The general low number of identified cores highlights the low diversity in the wine microbial community, but the high number of taxa identified only in OEN\_A show a high impact of the inoculation on the microbial diversity. B) Microbial abundance correlations. Correlations identified only when removing from the comparisons the values from a given inoculation type are called to be disrupted to by that inoculation type. Correlations identified regardless of removing any of the inoculation types are called “not affected correlations”.



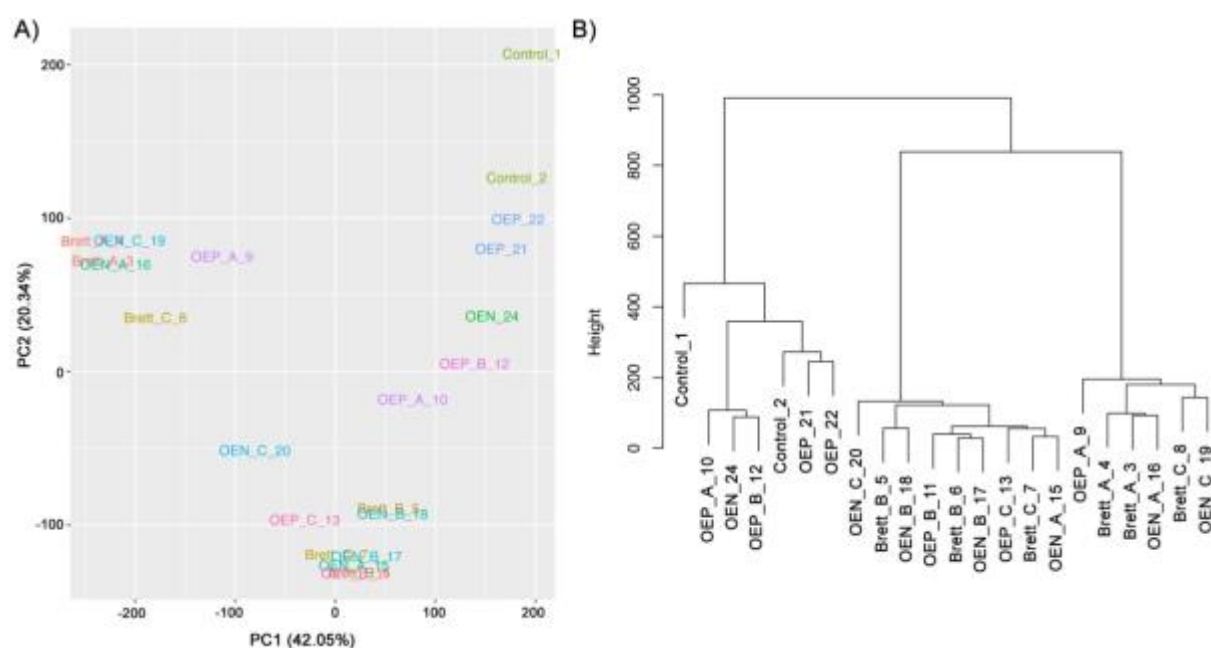

**Figure 4. Functional profiling.** A) PCA of the normalized gene mapping counts. B) Cladogram of the Euclidean distances clustered by the ward.D method.

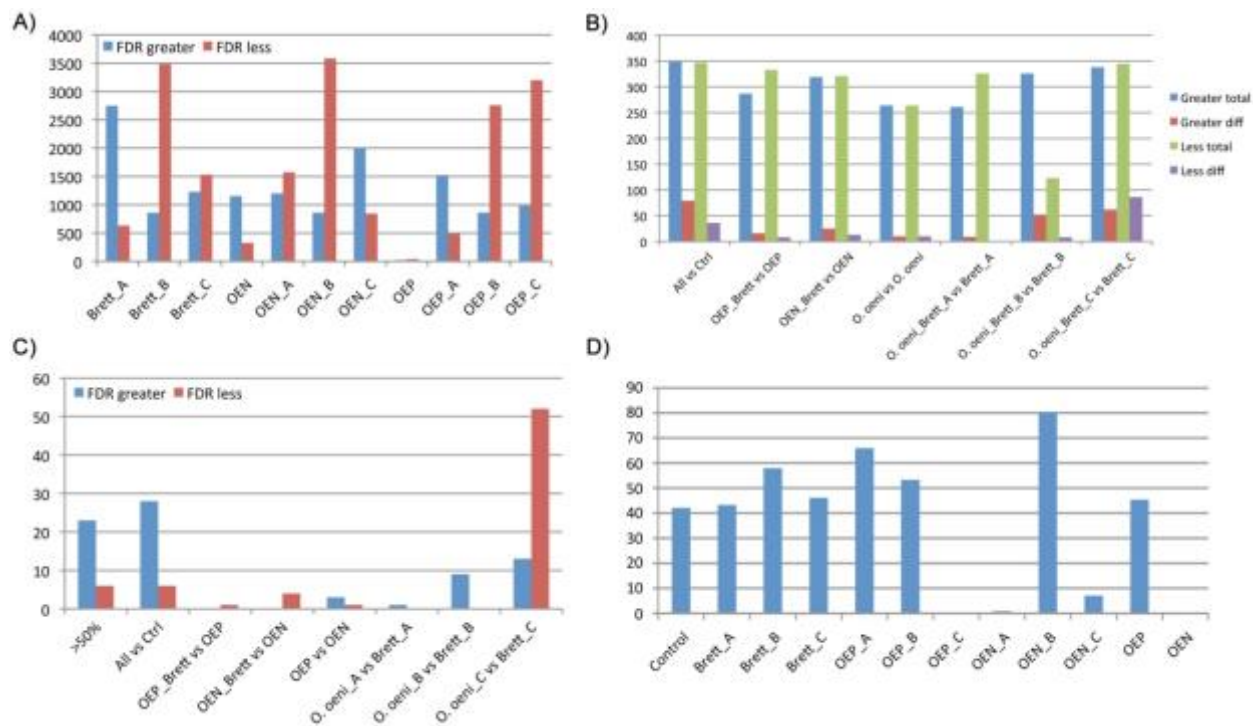

**Figure 5.** A) Differentially abundant KOs from the different inoculation types compared to the control. FDR greater denotes the KOs in statistically significant higher abundance, and FDR less are those in statistically significant less abundant. B) Pathways from the differentially abundant KOs. C) Core differentially abundant pathways from the differentially abundant KOs. D) Percentage of replicable top 5% abundant genes in each inoculation type sample pair. OEN and OEP\_C did not have a replicate to consider.
